# Supplementary material for: Preparation of efficient piezoelectric PVDF–HFP/Ni composite films by high electric field poling
Source: publisher site journal article supplement (doi:10.1515/ntrev-2022-0025), 2022-01-01
Supplement: Supplementary file 1 [file ntrev-2022-0025_sm.pdf]

## Supplementary material

In this study, the piezoelectric films work in  $31$  mode. As shown in Figure S2,  $1$  is the stretching direction which is also the stress direction of the piezoelectric film, and  $3$

is the film thickness direction which is also the direction of the generated voltage.  $2$  is the direction normal to  $1$  and  $3$  (Figure S3).

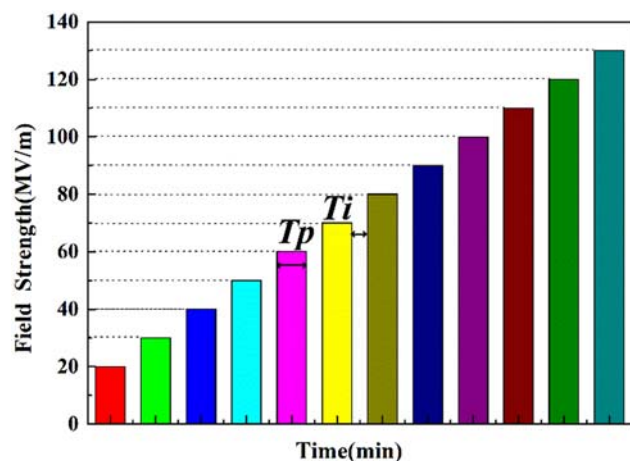

**Figure S1:** The relationship between the electric field and the time (operation time  $T_p$ : 8 min; pause time  $T_i$ : 4 min) during the poling process.

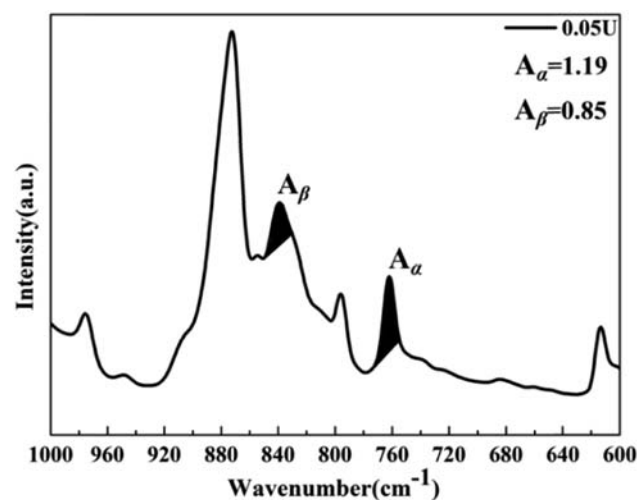

**Figure S3:** Calculation of the relative content of  $\beta$ -phase in the composite films.

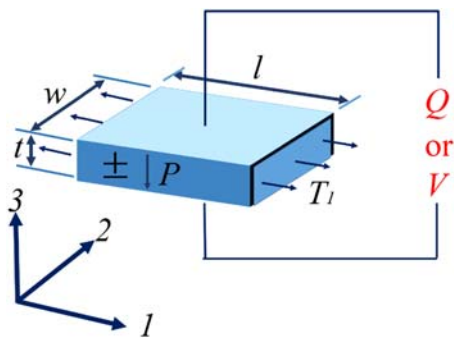

**Figure S2:** Directions determination of piezoelectric films.
